# Supplementary material for: Periostin and tenascin-C interaction promotes angiogenesis in ischemic proliferative retinopathy
Source: PubMed Central journal article supplement (PMC7283227; doi:10.1038/s41598-020-66278-1), 2020-06-09
Supplement: 41598_2020_66278_MOESM1_ESM.pdf [file 41598_2020_66278_MOESM1_ESM.pdf]

# **Periostin and tenascin-C interaction promotes angiogenesis in ischemic proliferative retinopathy**

Yuki Kubo<sup>1</sup>, Keijiro Ishikawa<sup>1\*</sup>, Kenichiro Mori<sup>1</sup>, Yoshiyuki Kobayashi<sup>1</sup>, Takahito Nakama<sup>1</sup>, Mitsuru Arima<sup>1</sup>, Shintaro Nakao<sup>1</sup>, Toshio Hisatomi<sup>1</sup>, Masatoshi Haruta<sup>2</sup>, Koh-Hei Sonoda<sup>1</sup> and Shigeo Yoshida<sup>2</sup>

<sup>1</sup>Department of Ophthalmology, Kyushu University Graduate School of Medical Sciences, Fukuoka, Japan;

<sup>2</sup>Department of Ophthalmology, Kurume University School of Medicine, Kurume, Japan.

\*Corresponding author: Keijiro Ishikawa

Department of Ophthalmology, Kyushu University Graduate School of Medical Sciences

Phone: (092) 642-5648;

FAX: (092) 642-5663,

Email: keijishi@med.kyushu-u.ac.jp

## **Supplementary Information**

# Supplementary Figure S1

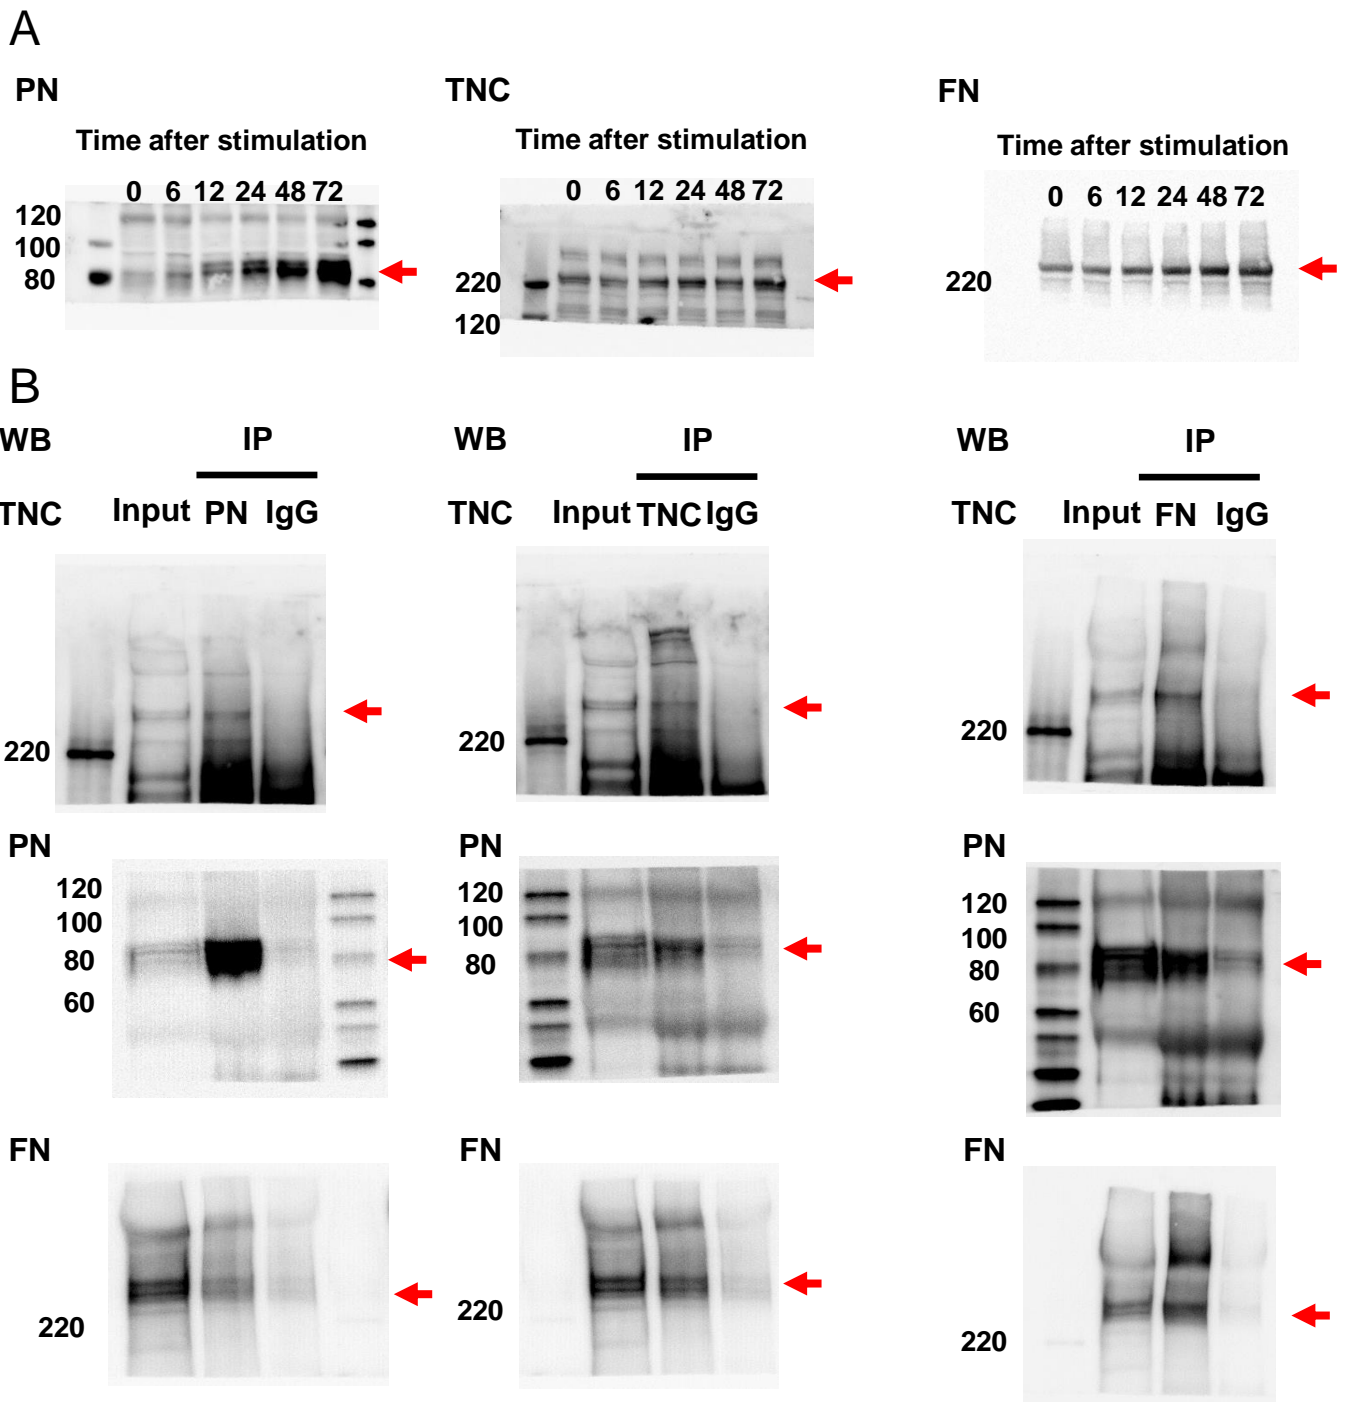

## Supplementary Figure S1. Full-length gel images of Figure 2B and 2C

A: Full-length gel images of western blot analysis of PN, TNC and FN in the cell lysates of HRECs after stimulation by IL-13 at different time points. B: Full-length gel images of western blot analysis of co-immunoprecipitation assay of cell lysates from HRECs stimulated by IL-13. The cell lysates were immunoprecipitated with IgG, anti-PN antibodies, anti-TNC antibodies and anti-FN antibodies. The precipitates were analyzed by western blotting with anti-PN, anti-TNC and anti-FN antibodies. Cropped areas in the Figure 2B and 2C are lanes pointed by red arrows.

**Supplementary Figure**

## Supplementary Figure S2

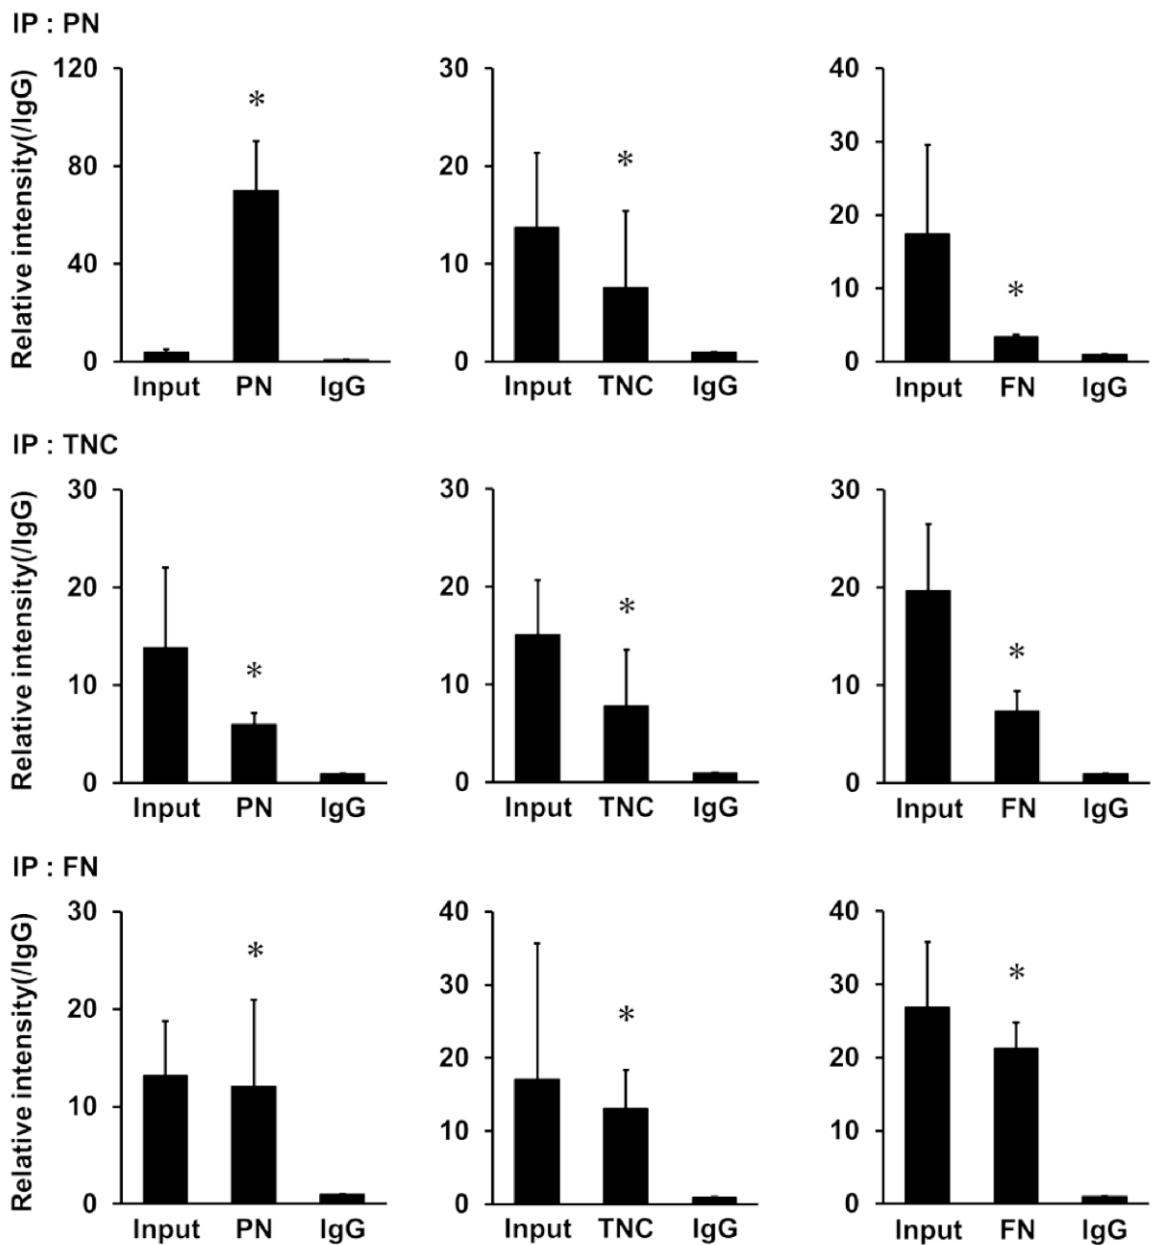

### Supplementary Figure S2. Quantification of signal intensity of co-IP western blot samples.

Signal intensity of co-IP samples (Figure 2C) were quantified by ImageJ software and relative intensity was calculated. Error bars represent standard deviations.

\*;  $p < 0.05$ , Wilcoxon rank sum test,  $n = 4/\text{group}$ .

## Supplementary Figure S3

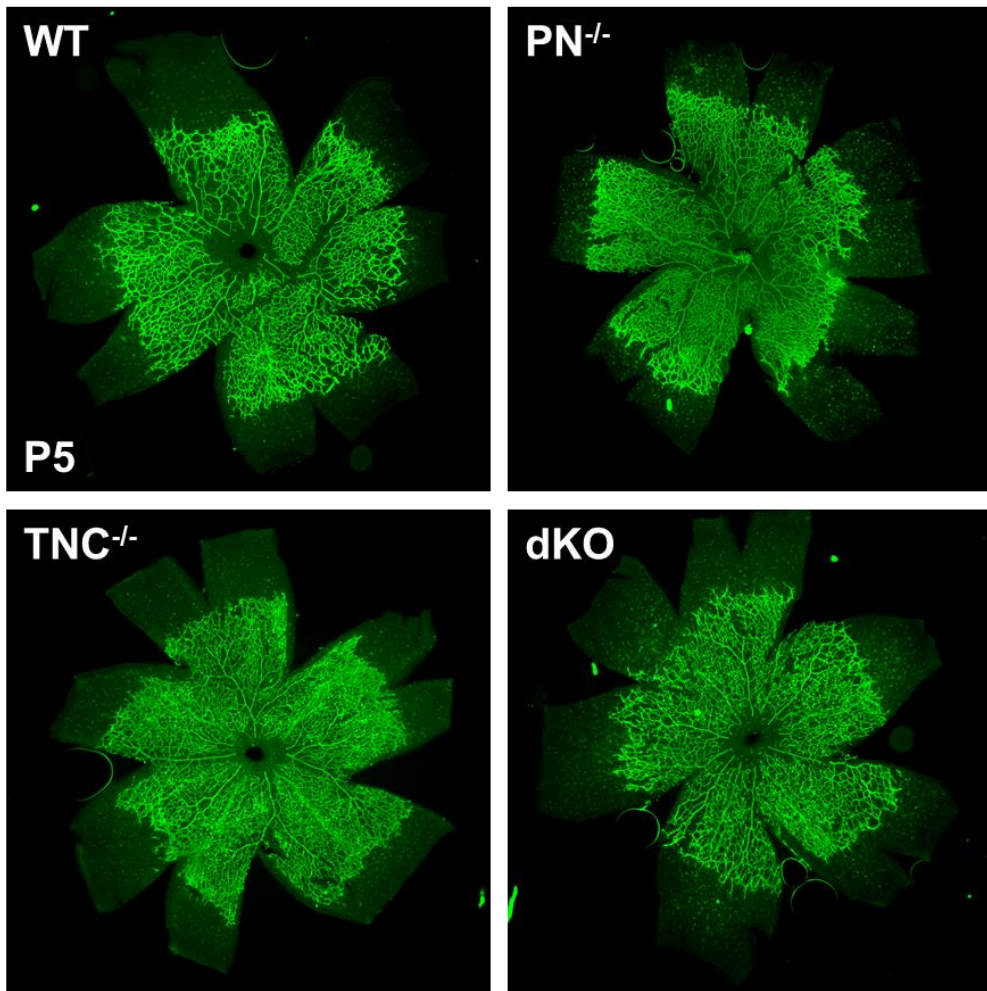

### Supplementary Figure S3. Normal retinal angiogenesis in developmental stage.

This image shows normal retinal angiogenesis of WT, PN<sup>-/-</sup>, TNC<sup>-/-</sup> and dKO mice at post natal 5. There seems to be no obvious difference in normal angiogenesis between these four strain of mice.

# Supplementary Figure S4

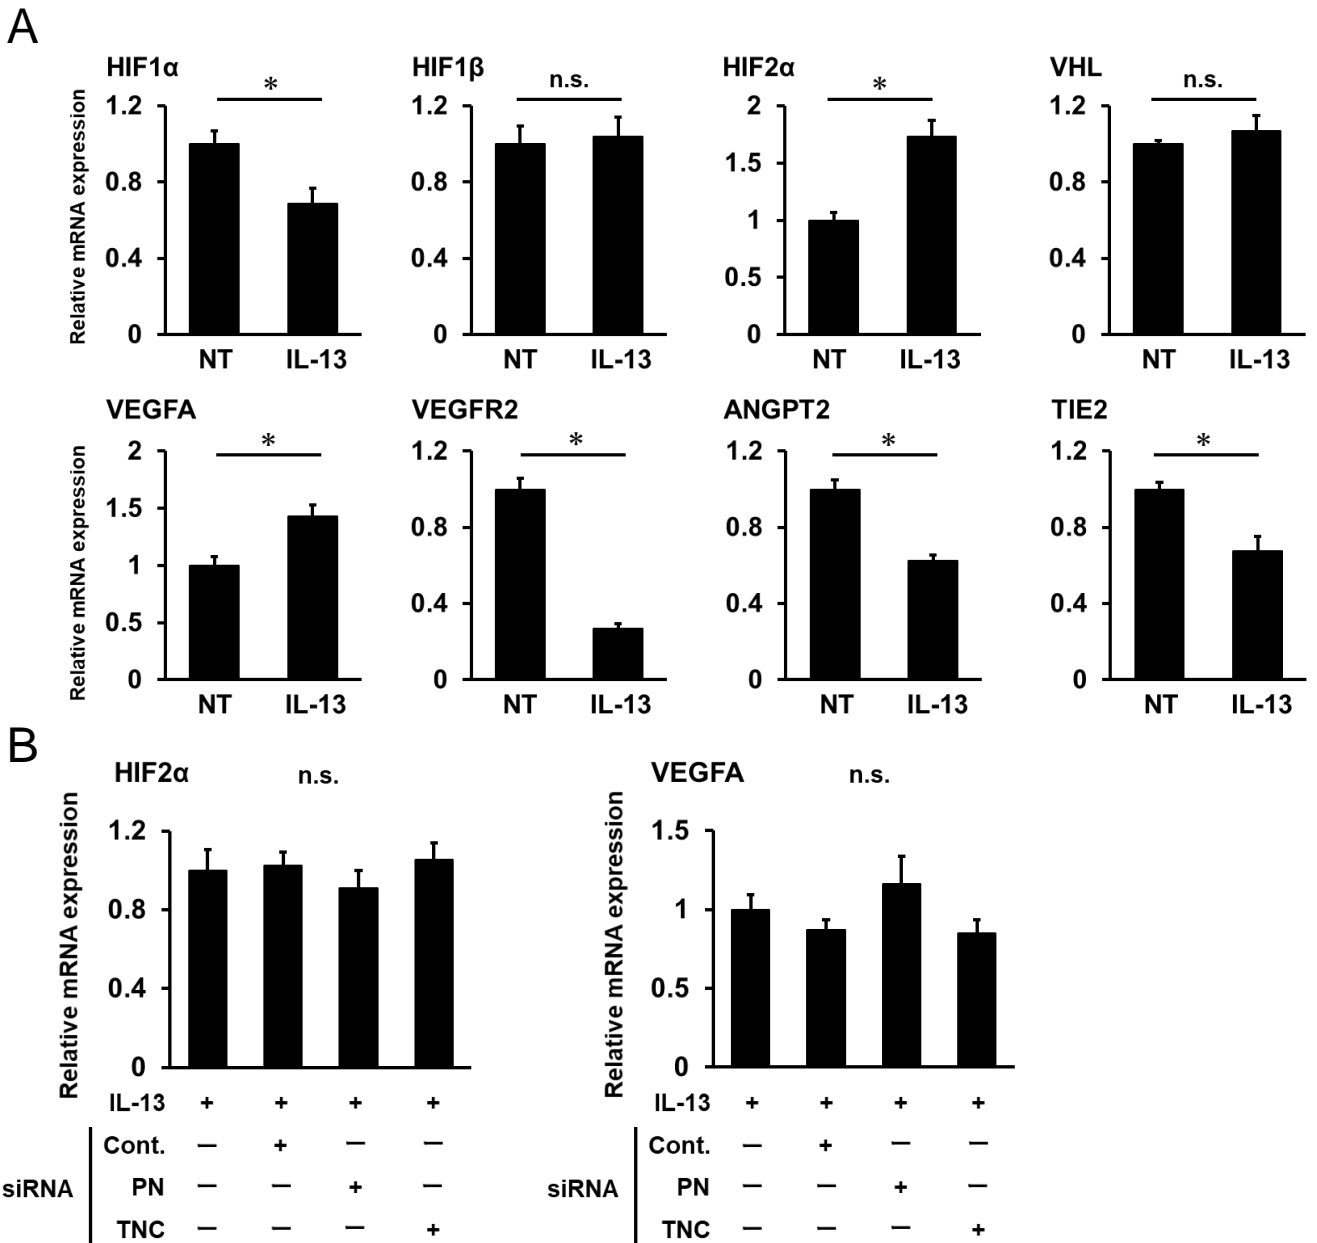

**Supplementary Figure S4. Alteration of mRNA expression of HIF pathway and related genes.**

A: Alteration of mRNA expression of HREC cells by IL-13 stimulation. HIF2α and VEGFA was significantly up-regulated. \* ; p<0.05, Wilcoxon rank sum test. B: Effect of PN or TNC inhibition on IL-13 induced mRNA expression of HIF2α and VEGFA. PN or TNC inhibition did not effect on the mRNA expression of HIF2α and VEGFA.

## Supplementary Figure S5

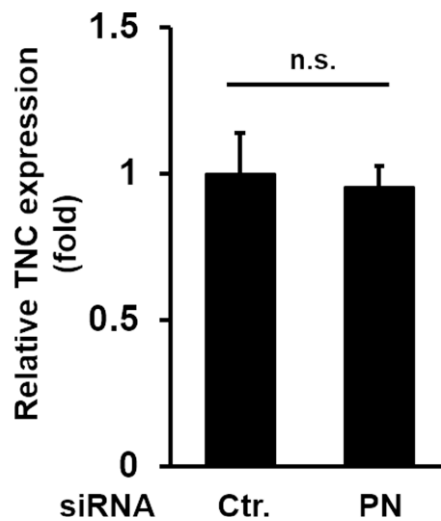

**Supplementary Figure S5. TNC mRNA expression was not affected by siRNA of PN**  
TNC mRNA expression after IL-13 stimulation with control RNA or PN siRNA transfection determined by qRT-PCR. mRNA levels were normalized to GAPDH mRNA expression. Relative mRNA levels are shown as fold changes. Error bars represent standard deviations. Wilcoxon rank sum test, n=4/group

## Supplementary Figure S6

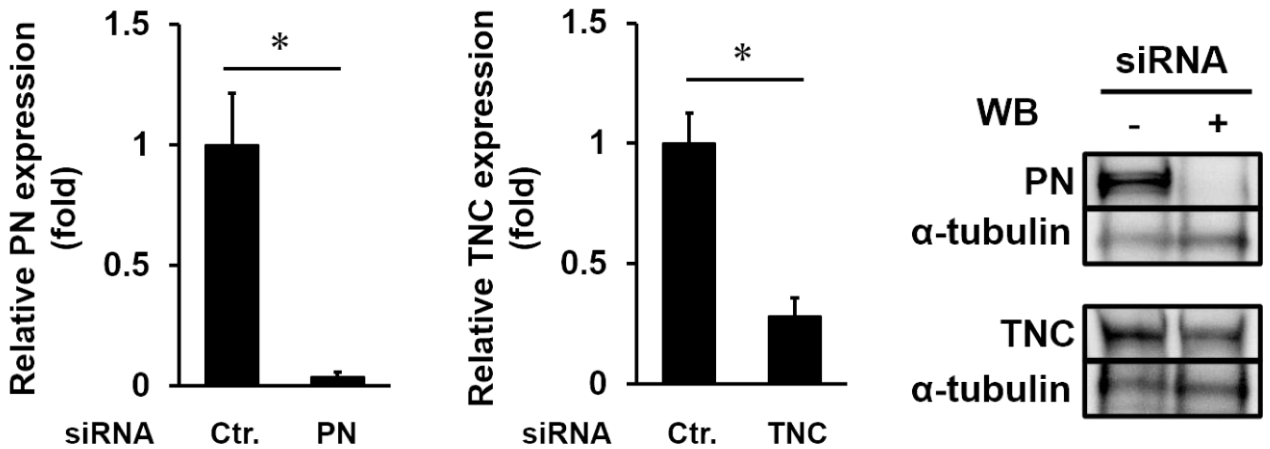

### Supplementary Figure S6. Suppressive effect on PN and TNC expression by siRNA treatment.

mRNA and protein expression after IL-13 stimulation with control or PN/TNC siRNA transfection. mRNA levels were determined by qRT-PCR, and were normalized to GAPDH mRNA expression. Relative mRNA levels are shown as fold changes. Error bars represent standard deviations.

\* ;  $p < 0.05$ , Wilcoxon rank sum test,  $n = 4$ /group. Protein levels were determined by western blot.

# Supplementary Table

## ELISA kits

PN : #326070442; SHINO-TEST

TNC : #27767; IBL

FN : BMS2028; Invitrogen

## Primers for SYBR green

PN : forward 5'-TGCCCAGCAGTTTTGCCCAT-3',

reverse 5'-CGTTGCTCTCCAAACCTCTA-3'

FN : forward 5'-GAGAATAAGCTGTACCATCGCAA-3',

reverse 5'-CGACCACATAGGAAGTCCCAG-3'

GAPDH : forward 5'-GAGTCAACGGATTTGGTCGT-3',

reverse 5'-CTTGATTTTGGAGGGATCTCGC-3'

HIF1 $\alpha$  : forward 5'-TATGAGCCAGAAGAAGCTTTTAGGC-3'

reverse 5'-CACCTCTTTTGGCAAGCATCCTG-3'

HIF1 $\beta$  : forward 5'-CTGCCAACCCCGAAATGACAT-3'

reverse 5'-CGCCGCTTAATAGCCCTCTG-3'

HIF2 $\alpha$  : forward 5'-TTGCTCTGAAAACGAGTCCGA-3'

reverse 5'-GGTCACCACGGCAATGAAAC-3'

pVHL : forward 5'-GGAGCCTAGTCAAGCCTGAGA-3'

reverse 5'-CATCCGTTGATGTGCAATGCG-3'

VEGFA : forward 5'-CTTGCCTTGCTGCTCTACC-3'

reverse 5'-CACACAGGATGGCTTGAAG-3'

VEGFR2 : forward 5'-GGCCCAATAATCAGAGTGGCA-3'

reverse 5'-TGTCATTTCCGATCACTTTTGGGA-3'

ANGPT2 : forward 5'-AACTTTCGGAAGAGCATGGAC-3'

reverse 5'-CGAGTCATCGTATTCGAGCGG-3'

TIE2 : forward 5'-TTAGCCAGCTTAGTTCTCTGTGG-3'

reverse 5'-AGCATCAGATACAAGAGGTAGGG-3'



# Supplementary Table

## TaqMan probe for qRT-PCR

TNC : Hs01115665\_m1; Applied Biosystems

GAPDH : Hs02758991\_g1; Applied Biosystems

## Primary antibodies for immunohistochemistry and immunofluorescence

PN : AF3548; R&D systems, 10 µg/ml

(for immunohistochemistry of FVMs)

201466-T10; Sino Biological, 1/200

(for immunofluorescence of FVM sections)

50450-RP02; Sino Biological, 1/500

(for immunohistochemistry and immunofluorescence of mice OIR sections )

TNC : NB110-68136; Novus Biologicals, 1/30

FN : ab23750; abcam, 1/40

(for immunohistochemistry of FVMs and mice OIR sections  
and immunofluorescence of FVM sections)

MAB88916; Millipore, 1/50

(for immunofluorescence of mice OIR sections)

CD34 : ab81289; abcam, 1/100

(for immunohistochemistry of FVMs and mice OIR sections)

RAM34; Thermo Fisher, 1/100

(for immunofluorescence of mice OIR sections)

## Secondary antibodies for immunofluorescence

Anti-goat : A11056; Invitrogen, 1/1000

Anti-mouse : A21245; Invitrogen, 1/1000

Anti-rabbit : A21235; Invitrogen, 1/1000

# Supplementary Table

## Primary antibodies for western blotting

PN : AF3548, 1 µg/ml

TNC : NB110-68136, 5 µg/ml for lysate

#12221; CST, 1/500 for blotting of immunoprecipitation

FN : ab23750, 1 µg/ml

α-Tubulin : #2125; CST, 1/1000

## HRP conjugated secondary antibody for western blotting

Anti-goat : P0449; DAKO, 1/500

Anti-mouse : P0447; DAKO, 1/500

Anti-rabbit : P0448; DAKO, 1/500

## Antibodies for immunoprecipitation

PN : AF3548, 25 µg/ml

TNC : #12221, 1/25

FN : ab2413; abcam, 25 µg/ml

Goat IgG : NI02; Millipore, 25 µg/ml

Rabbit IgG : NI01; Millipore, 25 µg/ml

## HRP conjugated antibody for immunoprecipitation

Anti-goat : 18-8814-31; ROCKLAND, 1/1000

Anti-mouse : 18-8817-33; ROCKLAND, 1/1000

Anti-rabbit : 18-8816-33; ROCKLAND, 1/1000

## siRNAs

PN : sc-61324; Santa Cruz Biotechnology

TNC : sense 5'-CUGAAAUUGGAAACUAAATT-3',

antisense 5'-UUUAAGUUUCCAAUUUCAGTT-3'

FN : SASI\_Hs01\_00207242 ; Sigma-Aldrich
